# Supplementary material for: Interplay of plasmonic and charge transfer effects for ultrasensitive Ag–WO 3 /TiO 2 photonic crystal SERS sensors
Source: Royal Society of Chemistry journal article supplement (doi:10.1039/d4ma00995a), 2024-12-04
Supplement: d4ma00995a1.pdf [file d4ma00995a1.pdf]

## **Interplay of plasmonic and charge transfer effects for ultrasensitive Ag–WO<sub>3</sub>/TiO<sub>2</sub> photonic crystal SERS sensors**

Maria-Athina Apostolaki,<sup>a</sup> Elias Sakellis,<sup>a,b</sup> Spiros Gardelis <sup>a</sup> and Vlassis Likodimos <sup>\*a</sup>

<sup>a</sup>*Section of Condensed Matter Physics, Department of Physics, National and Kapodistrian University of Athens, University Campus, 15784 Athens, Greece*

<sup>b</sup>*Institute of Nanoscience and Nanotechnology, National Center for Scientific Research “Demokritos”, Agia Paraskevi, 15341 Athens, Greece*

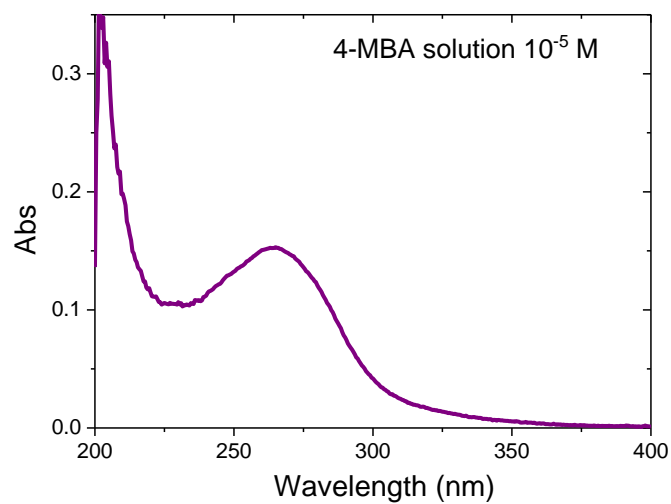

**Fig. S1** Absorbance spectra of 4-MBA  $10^{-5}$  M ethanol solution.

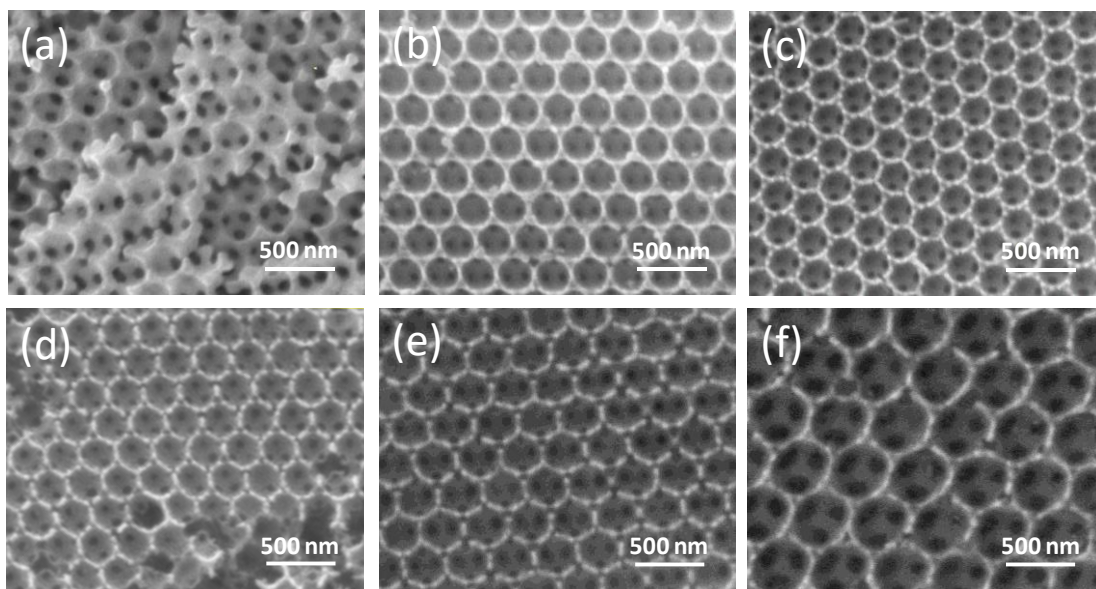

**Fig. S2** SEM images for (a) PC300 WO<sub>3</sub>, (b) PC300 4:1, (c) PC300 1:2, (d) PC300 TiO<sub>2</sub>, (e) PC340 TiO<sub>2</sub> and (f) PC406 TiO<sub>2</sub> films.

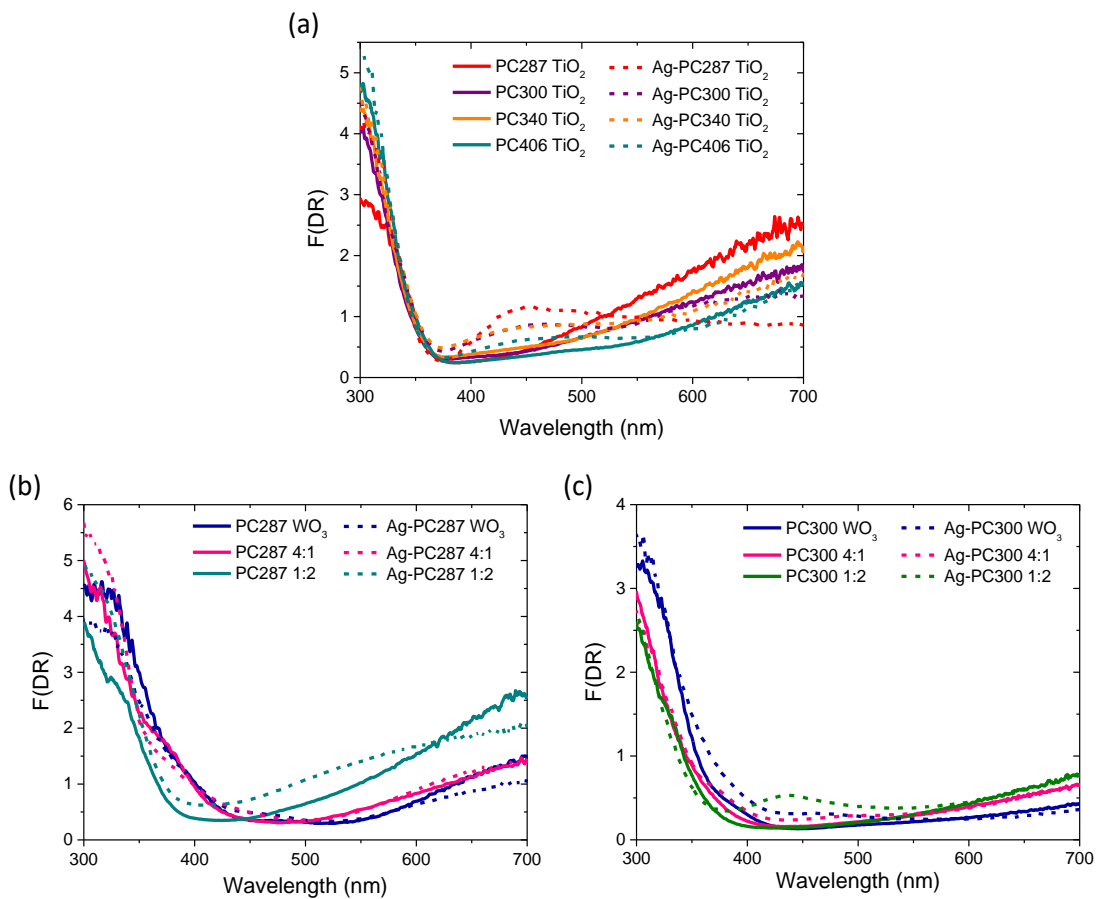

**Fig. S3** Kubelka-Munk plots for the (a) TiO<sub>2</sub> PC films and the single WO<sub>3</sub> and composite WO<sub>3</sub>/TiO<sub>2</sub> (b) PC287 and (c) PC300 films before and after Ag-deposition.

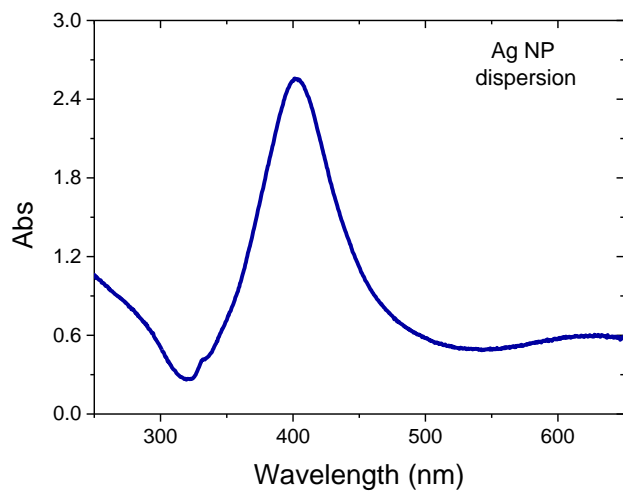

**Fig. S4** Absorbance spectra of Ag NPs dispersion.

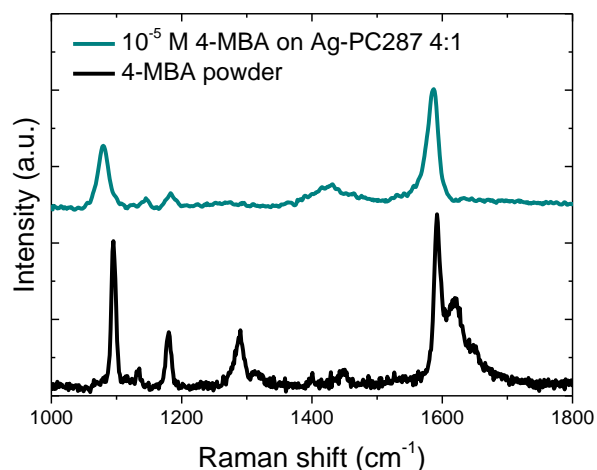

**Fig. S5** Raman spectra of 4-MBA powder and  $10^{-5}$  M solution on the Ag-PC287 4:1 substrate at 532 nm.

The average SERS enhancement factor (EF) was estimated using the most intense 4-MBA vibration at  $1585\text{ cm}^{-1}$  for the best performing Ag-PC287 4:1 substrate according to the relation<sup>1</sup>:

$$EF = \frac{I_{SERS} / N_{SERS}}{I_{bulk} / N_{bulk}}$$

where  $I_{SERS}$  and  $I_{bulk}$  are the Raman intensities of the selected 4-MBA Raman band for the PC substrate and the reference solid 4-MBA powder.  $N_{SERS}$  is the number of adsorbed 4-MBA molecules within the laser spot area ( $A_{spot}$ ) during SERS measurements, while  $N_{bulk}$  is the number of analyte molecules in the scattering volume of the powder sample, approximated as a cylinder of area  $A_{spot}$  and effective height  $h$ , which corresponds to the confocal depth of the focused laser beam of about  $30\text{ }\mu\text{m}$  for a  $\times 40$  ( $NA=0.65$ ) dry objective at  $532\text{ nm}$ .<sup>2,3</sup> Thus,  $N_{bulk}$  is given by

$$N_{bulk} = \frac{m}{M} N_A = \frac{\rho A_{spot} h N_A}{M},$$

where  $m$  is the mass of the 4-MBA molecules within the scattering volume in the normal Raman measurement,  $\rho = 1.5\text{ g/cm}^3$  is the density and  $M = 154.18\text{ g/mol}$  the molar mass of 4-MBA and  $N_A$  is the Avogadro's number.  $N_{SERS}$  is given by

$$N_{SERS} = \frac{CV N_A A_{spot}}{A_{film}}$$

where  $C$  is the concentration [M] of the 4-MBA solution,  $V$  is the volume of the drop casted on the SERS substrate, and  $A_{film}$  is the area of the SERS substrates. The EF is accordingly reduced to

$$EF = \frac{I_{SERS} N_{bulk}}{I_{bulk} N_{SERS}} = \frac{I_{SERS} \rho A_{film} h}{I_{bulk} C V M}$$

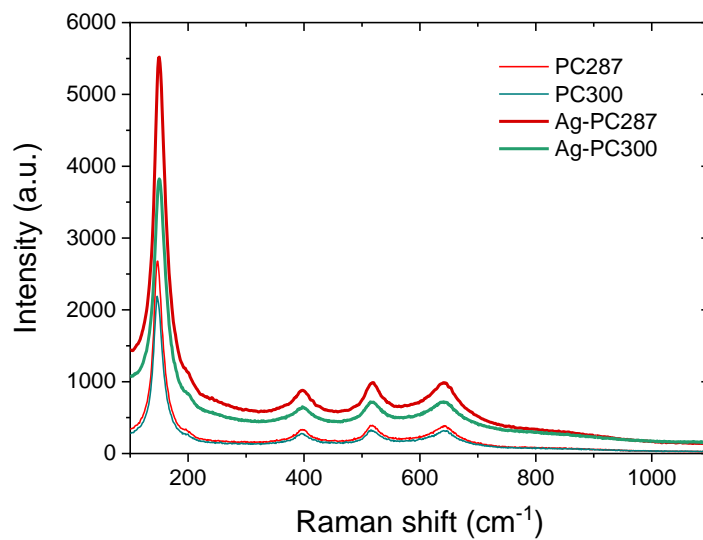

**Fig. S6** Comparative Raman spectra of the TiO<sub>2</sub> PC287 and PC300 films before (thin lines) and after Ag deposition (thick lines) at 532 nm.

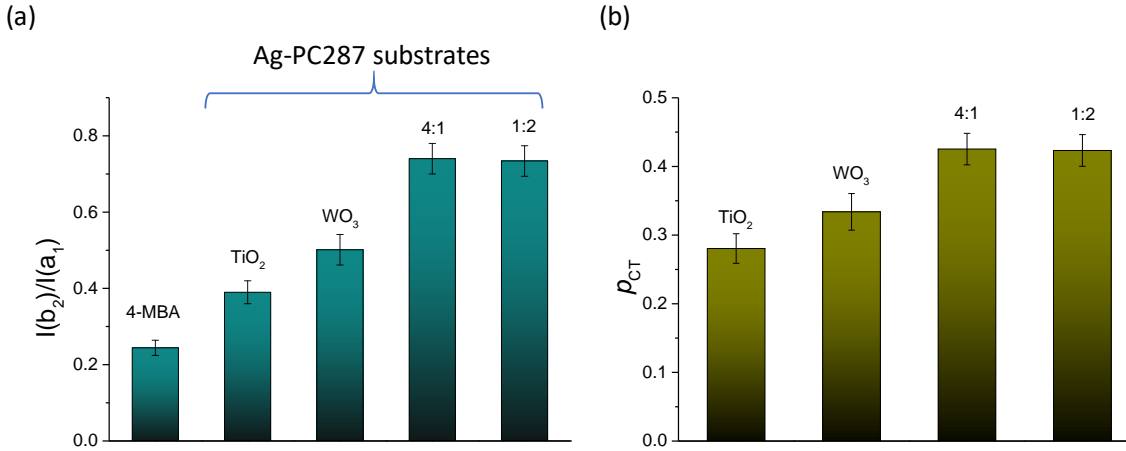

**Fig. S7** (a) The intensity ratio of the non-totally ( $1140\text{ cm}^{-1}$ ,  $b_2$ ) to the totally ( $1182\text{ cm}^{-1}$ ,  $a_1$ ) symmetric mode of 4-MBA ( $10^{-4}\text{ M}$ ) for the Ag-PC287 substrates. (b) The variation of the corresponding degree of charge transfer given by  $p_{CT}$  for the Ag-PC287 substrates.

According to Lombardi and Birke<sup>4</sup>, the relative contribution of charge transfer (CT) to the intensity of a specific Raman mode  $k$  is defined by the ratio  $p_{CT}$  :

$$p_{CT}(k) = \frac{I^k(CT) - I^k(SPR)}{I^k(CT) + I^0(SPR)}$$

where  $k$  is the index for the vibrational mode, whose SERS intensity  $I^k(CT)$  is enhanced by CT resonance. The calculation of  $p_{CT}$  is based on the selection of two reference Raman bands. For a totally symmetric mode, its intensity, defined as  $I^0(SPR)$ , arises solely from the contribution of surface plasmon resonance (SPR). In the case of a non-totally symmetric  $k$  mode, its intensity is mainly determined from the CT contribution  $I^k(CT)$ , whereas the SPR contribution is very small and thus  $I^k(SPR)$  can be neglected. In the present case,  $p_{CT}$  was calculated using the intensities of the non-totally ( $1140\text{ cm}^{-1}$ ,  $b_2$ ) and the totally ( $1182\text{ cm}^{-1}$ ,  $a_1$ ) symmetric vibrational modes of 4-MBA as  $I^k(CT)$  and  $I^0(SPR)$ , respectively.<sup>5</sup>

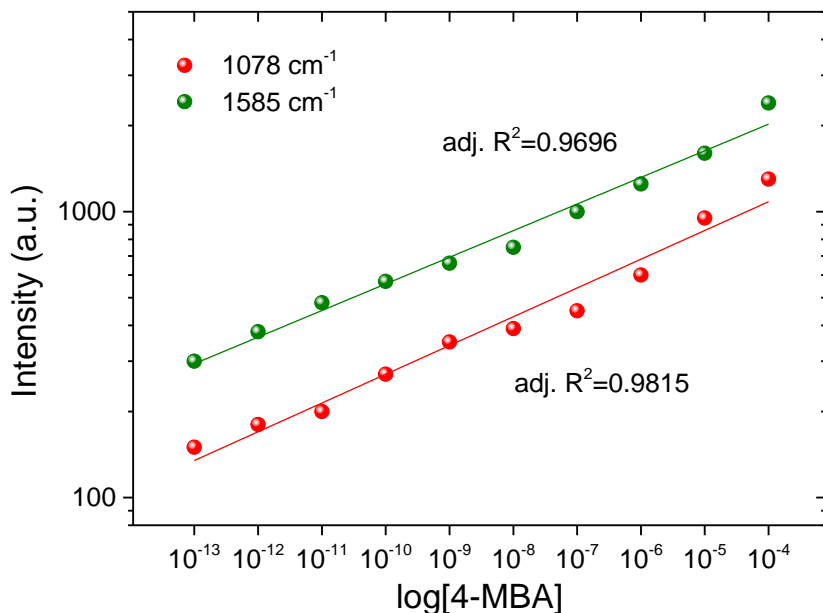

**Fig. S8** Raman intensity of the  $1079$  and  $1585\text{ cm}^{-1}$  modes as a function of the 4-MBA concentration. Solid lines show the best fit curves with the corresponding adjusted  $R^2$  values.

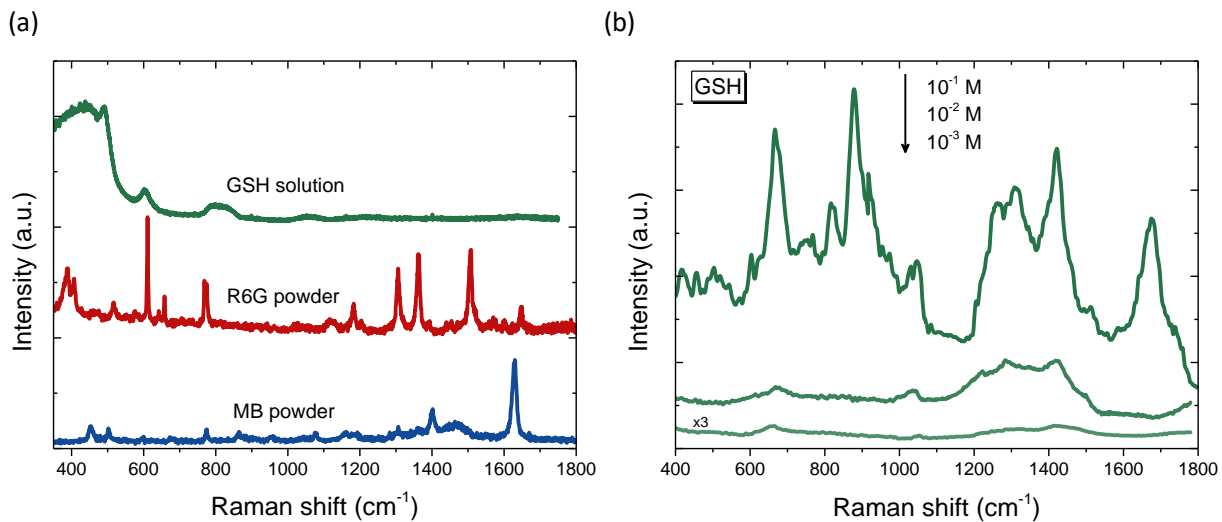

**Fig. S9** (a) Raman spectra of 0.1 M GSH aqueous solution, R6G and MB powder samples. (b) Raman spectra of GSH solutions of variable concentrations on the Ag-PC287 4:1 substrate. The excitation wavelength for R6G and MB powder samples was 532 nm, while for GSH solutions its was 785 nm.

**Table S1** Structural and optical properties of Ag–WO<sub>3</sub>/TiO<sub>2</sub> PC substrates.

| Substrate                 | D <sup>1</sup><br>(nm) | Variation <sup>2</sup><br>% | λ <sub>exp</sub> (15°) <sup>3</sup><br>(nm) | n <sub>eff</sub> | 1–f     | λ (0°) <sup>4</sup><br>(nm) |
|---------------------------|------------------------|-----------------------------|---------------------------------------------|------------------|---------|-----------------------------|
| Ag–PC287 WO <sub>3</sub>  | 235(5)                 | 82(2)                       | 495                                         | 1.32(3)          | 0.23(2) | 504                         |
| Ag–PC287 4:1              | 220(5)                 | 77(2)                       | 475                                         | 1.33(3)          | 0.22(1) | 485                         |
| Ag–PC287 1:2              | 190(5)                 | 66(2)                       | 418                                         | 1.37(3)          | 0.20(2) | 426                         |
| Ag–PC287 TiO <sub>2</sub> | 170(5)                 | 59(2)                       | 368                                         | 1.42(4)          | 0.19(2) | 375                         |
| Ag–PC300 WO <sub>3</sub>  | 245(5)                 | 82(2)                       | 515                                         | 1.31(3)          | 0.23(2) | 525                         |
| Ag–PC300 4:1              | 225(5)                 | 75(2)                       | 490                                         | 1.35(3)          | 0.23(1) | 498                         |
| Ag–PC300 1:2              | 195(5)                 | 65(2)                       | 434                                         | 1.39(3)          | 0.21(1) | 442                         |
| Ag–PC300 TiO <sub>2</sub> | 175(5)                 | 58(2)                       | 390                                         | 1.39(4)          | 0.17(2) | 397                         |
| Ag–PC340 TiO <sub>2</sub> | 215(5)                 | 62(2)                       | 474                                         | 1.37(3)          | 0.16(2) | 483                         |
| Ag–PC406 TiO <sub>2</sub> | 250(5)                 | 62(2)                       | 492                                         | 1.24(3)          | 0.10(1) | 503                         |

<sup>1</sup> D: macropore diameter of the Ag–WO<sub>3</sub>/TiO<sub>2</sub> photonic crystal films determined by SEM.

<sup>2</sup> Macropore variation: D/D<sub>sphere</sub>.

<sup>3</sup> λ<sub>exp</sub> (15°): PBG position determined from the 15° incidence specular spectra.

<sup>4</sup> λ (0°): PBG position calculated from modified Bragg law at θ=0°.

The photonic band gap (PBG) positions were estimated by modified Bragg's law for first-order diffraction from the (111) fcc planes<sup>6</sup>:

$$\lambda = 2d_{111}\sqrt{n_{\text{eff}}^2 - \sin^2\theta}$$

where λ is the PGB wavelength,  $d_{111} = \sqrt{2/3}D$  is the spacing between (111) planes,  $D$  is the macropore diameter and  $\theta$  is the angle between the incident beam and the plane normal. The effective refractive index  $n_{\text{eff}}$  is calculated as  $n_{\text{eff}}^2 = n_{\text{void}}^2 f + n_{\text{MO}}^2 (1 - f)$ , where the refractive indices  $n_{\text{void}}$  and  $n_{\text{MO}}$  correspond to the void spheres and metal oxides that occupy the inverse opal skeleton for  $n_{\text{WO}_3} = 2.03$ ,  $n_{\text{TiO}_2} = 2.55$  and  $n_{\text{air}} = 1$ , while  $f$  is the void filling fraction with the value of 0.74 for the ideal fcc lattice. Stop band positions were estimated for normal incidence ( $\theta = 0^\circ$ ) using the obtained filling fractions.

## References

- 1 E. C. Le Ru, E. Blackie, M. Meyer and P. G. Etchegoin, *J. Phys. Chem. C*, 2007, **111**, 13794–13803.
- 2 W. B. Cai, B. Ren, X. Q. Li, C. X. She, F. M. Liu, X. W. Cai and Z. Q. Tian, *Surf. Sci.*, 1998, **406**, 9–22.
- 3 P. Tomba, M. P. Miguel and C. J. Perez, *J. Raman Spectrosc.*, 2011, **42**, 1330–1334.
- 4 J. R. Lombardi and R. L. Birke, *J. Phys. Chem. C*, 2008, **112**, 5605–5617.
- 5 X. Jiang, D. Yina, M. Yang, J. Du, W. Wang, L. Zhang, L. Yang, X. Han and B. Zhao, *Appl. Surf. Sci.*, 2019, **487**, 938–944.
- 6 V. Likodimos, *Appl. Catal. B Environ.*, 2018, **230**, 269–303.
